# Supplementary material for: Simple and robust diagnosis of early, small and AFP-negative primary hepatic carcinomas: an integrative approach of serum fluorescence and conventional blood tests
Source: PubMed Central journal article supplement (PMC5325425; doi:10.18632/oncotarget.11771), 2016-08-31
Supplement: oncotarget-07-64053-s001.pdf [file oncotarget-07-64053-s001.pdf]

## **Simple and robust diagnosis of early, small and AFP-negative primary hepatic carcinomas: an integrative approach of serum fluorescence and conventional blood tests**

### **Supplementary Materials**

**Supplementary Table S1: Associations of serum fluorescence indicators with age and gender.** See Supplementary\_Table\_S1

**Supplementary Table S2: Correlations of serum fluorescence intensity with blood laboratory test results.** See Supplementary\_Table\_S2

**Supplementary Table S3: AUROCs of single indicators of serum fluorescence intensity and laboratory blood tests for diagnosing PHC.** See Supplementary\_Table\_S3

**Supplementary Table S4: Diagnostic value of models F-M and FAHB-M for PHC subgroups based on serum AFP levels.** See Supplementary\_Table\_S4

**Supplementary Table S5: Diagnostic value of models F-M and FAHB-M for PHC subgroups based on BCLC stages.** See Supplementary\_Table\_S5

**Supplementary Table S6: Diagnostic value of models F-M and FAHB-M for PHC subgroups based on tumor sizes.** See Supplementary\_Table\_S6

**Supplementary Table S7: Comparison of the diagnostic values of models F-M and FAHB-M for PHC diagnosed by pathology and imaging.** See Supplementary\_Table\_S7

**Supplementary Table S8: Positive rates of models F-M and FAHB-M and AFP in PHC with different histological types.** See Supplementary\_Table\_S8
